# Supplementary material for: Decrease of IL-5 Production by Naive T Cells Cocultured with IL-18-Producing BCG-Pulsed Dendritic Cells from Patients Allergic to House Dust Mite
Source: Vaccines (Basel). 2021 Mar 18;9(3):277. doi: 10.3390/vaccines9030277 (PMC8003153; doi:10.3390/vaccines9030277)
Supplement: Supplementary file 1 [file vaccines-09-00277-s001.zip › Table S1.pdf]

**Table S1:** Characteristics of blood donors included into the study

|                         | Healthy donors | Asthmatic patients                                                                                                                                                                                                                                                                                             | <i>p</i> values |
|-------------------------|----------------|----------------------------------------------------------------------------------------------------------------------------------------------------------------------------------------------------------------------------------------------------------------------------------------------------------------|-----------------|
| Sex (F/M)               | 21/40 [60%]    | 6/22 [27.2%]                                                                                                                                                                                                                                                                                                   | <i>p</i> =0.055 |
| Mean age (year)         | 26.72 ± 0.45   | 25.13 ± 1.18                                                                                                                                                                                                                                                                                                   | <i>p</i> =0.141 |
| range                   | 23-35          | 19-35                                                                                                                                                                                                                                                                                                          |                 |
| Duration of asthma (y)  | NA             | 12.8 ± 1.47                                                                                                                                                                                                                                                                                                    |                 |
| Atopy                   | 0/40           | 22/22                                                                                                                                                                                                                                                                                                          |                 |
| Allergy to Der p 1      | 0/40           | 19/22                                                                                                                                                                                                                                                                                                          |                 |
| Treatment               | None           | Allergic donors refrained for 4 days before blood collection from oral antihistaminic drugs or leukotriene receptor agonists, but were maintained on routine inhaled corticosteroids, no patient was undergoing allergen-specific immunotherapy or took oral corticosteroid treatment at the time of the study |                 |
| SPT [mm]                | NA             | 3-12mm                                                                                                                                                                                                                                                                                                         |                 |
| Total IgE (kU/l)        | <20            | 256.8 ± 48                                                                                                                                                                                                                                                                                                     |                 |
| IgE anti-Der p 1 (kU/l) | <0.35          | 18.9 ± 4.8                                                                                                                                                                                                                                                                                                     |                 |

Data are presented as n or mean ± SEM. Y, year; SPT, Skin Prick test; NA, non applicable;; Der p 1, *Dermatophagoides pteronyssinus* allergen 1.
